# Supplementary material for: iTRAQ-based quantitative proteomic analysis reveals potential factors associated with the enhancement of phenazine-1-carboxamide production in Pseudomonas chlororaphis P3
Source: PubMed Central journal article supplement (PMC4895345; doi:10.1038/srep27393), 2016-06-07
Supplement: srep27393-s1.pdf [file srep27393-s1.pdf]

## **Supplementary Data for:**

### **iTRAQ-based quantitative proteomic analysis reveals potential factors associated with the enhancement of phenazine-1-carboxamide production in *Pseudomonas chlororaphis* P3**

Xue-Jie Jin, Hua-Song Peng, Hong-Bo Hu, Xian-Qing Huang, Wei Wang,

Xue-Hong Zhang\*

State Key Laboratory of Microbial Metabolism, School of Life Sciences

and Biotechnology, Shanghai Jiao Tong University, Shanghai 200240,

China

\*Corresponding author: Tel.: +86-21-3420-6715; fax: +86-21-3420-5081

E-mail: xuehzhang@sjtu.edu.cn

#### **Contents:**

**Supplementary Tables S1-S3**

**Supplementary Figures S1-S2**

## Supplementary Tables

**Supplementary Table S1. Total of 138 genes occurred point mutation (s) in the genome of mutant P3. TC represents termination codon.**

| IMG locus tag_HT66 | Gene        | Gene product name                                                                 | nucleotides change        | Amino acid change |
|--------------------|-------------|-----------------------------------------------------------------------------------|---------------------------|-------------------|
| Pchs_01406         |             | Predicted xylanase/chitin deacetylase                                             | C780T                     | -                 |
| Pchs_06129         |             | putative spermidine/putrescine transport system substrate-binding protein         | G98A                      | R33H              |
| Pchs_05107         | <i>pvdJ</i> | Non-ribosomal peptide synthetase modules and related proteins                     | C988T                     | Q330TC            |
| Pchs_02623         |             | transcriptional regulator, TetR family                                            | G403A                     | A135T             |
| Pchs_02626         | <i>lysA</i> | diaminopimelate decarboxylase                                                     | G228A                     | -                 |
| Pchs_02632         | <i>rtcA</i> | RNA 3'-terminal phosphate cyclase (ATP)                                           | C776T                     | A259V             |
| Pchs_02640         |             | hypothetical protein                                                              | C318T,<br>C321T,<br>T438C | -                 |
| Pchs_02652         |             | carboxynorspermidine dehydrogenase                                                | C1103T                    | A368V             |
| Pchs_02660         |             | Predicted flavoprotein CzcO associated with the cation diffusion facilitator CzcD | C71T                      | A24V              |
| Pchs_02661         |             | transcriptional regulator, AraC family                                            | G735A                     | -                 |
| Pchs_02670         |             | hypothetical protein                                                              | G981A                     | -                 |
| Pchs_02674         |             | Purine nucleoside permease                                                        | G604A                     | E202K             |
| Pchs_02682         |             | glycolate oxidase FAD binding subunit                                             | G641A                     | R214H             |
| Pchs_02730         |             | Acyl-CoA dehydrogenase                                                            | G1242A                    | -                 |
| Pchs_02753         |             | amino acid adenylation domain-containing protein                                  | C5098T                    | P1700S            |
| Pchs_02887         | <i>pdxB</i> | 4-phosphoerythronate dehydrogenase (EC 1.1.1.290)                                 | C489T                     | D220N             |
| Pchs_02928         | <i>zipA</i> | cell division protein ZipA                                                        | C598T                     | P200S             |
| Pchs_02108         |             | hypothetical protein                                                              | C492T                     | -                 |
| Pchs_02115         |             | Choline/Carnitine o-acyltransferase                                               | G710 to<br>A710           | S237N             |
| Pchs_02119         |             | Fatty acid desaturase                                                             | G335A                     | G113R             |
| Pchs_02125         |             | Predicted arabinose efflux permease, MFS family                                   | C1053T                    | D70N              |
| Pchs_02127         |             | hypothetical protein                                                              | C352T                     | P118S             |
| Pchs_02133         |             | type VI secretion system secreted protein VgrG                                    | G690A,<br>T716C           | L239P             |
| Pchs_03137         |             | transcriptional regulator, GntR family                                            | A723G                     | -                 |
| Pchs_04575         | <i>cbtA</i> | cobalt transporter subunit CbtA                                                   | C404T                     | A135V             |
| Pchs_04589         | <i>yefF</i> | microcin C transport system ATP-binding                                           | G880A                     | G235D             |

|            |             |                                                                               |                            |              |
|------------|-------------|-------------------------------------------------------------------------------|----------------------------|--------------|
|            |             | protein                                                                       |                            |              |
| Pchs_04590 | <i>yejE</i> | microcin C transport system permease protein                                  | G41A                       | R14H         |
| Pchs_04595 |             | Outer membrane receptor proteins, mostly Fe transport                         | G30A, G2854A               | A952T        |
| Pchs_04600 |             | Protein N-acetyltransferase, RimJ/RimL family                                 | G123A                      | P20S         |
| Pchs_04929 | <i>codA</i> | cytosine deaminase                                                            | C131T                      | P44L         |
| Pchs_05033 |             | uncharacterized protein                                                       | G340A                      | E114K        |
| Pchs_02134 |             | hypothetical protein                                                          | C327T                      | -            |
| Pchs_06595 |             | hypothetical protein                                                          | G447A, G483T, A486C, G498A | E162D, H166Q |
| Pchs_02221 |             | Integrase                                                                     | G723A                      | W241TC       |
| Pchs_02223 |             | Superfamily I DNA or RNA helicase                                             | T497C                      | V166A        |
| Pchs_02278 |             | MFS transporter, CP family, cyanate transporter                               | G271A                      | A91T         |
| Pchs_02305 |             | biotin-dependent carboxylase uncharacterized domain-containing protein        | C835T                      | P279S        |
| Pchs_02308 |             | Uncharacterized protein involved in outer membrane biogenesis                 | G618A                      | -            |
| Pchs_02310 |             | beta-hydroxylase                                                              | C472T                      | -            |
| Pchs_02313 |             | outer membrane autotransporter barrel domain-containing protein               | G2541A                     | -            |
| Pchs_02369 |             | type I secretion C-terminal target domain (VC_A0849 subclass)                 | A3238G                     | D1080G       |
| Pchs_02395 |             | condensin subunit ScpA                                                        | G615A                      | -            |
| Pchs_02431 |             | Uncharacterized protein conserved in bacteria                                 | C879T                      | -            |
| Pchs_02435 | <i>fliD</i> | flagellar hook-associated protein 2                                           | C165T                      | -            |
| Pchs_02438 | <i>fleQ</i> | sigma-54 specific transcriptional regulator, flagellar regulatory protein A   | C1160T                     | P387L        |
| Pchs_02439 | <i>fleS</i> | PAS/PAC sensor signal transduction histidine kinase                           | C732T                      | -            |
| Pchs_02441 | <i>fliE</i> | flagellar hook-basal body complex protein FliE                                | G78A                       | -            |
| Pchs_03109 |             | transcriptional regulator, XRE family with cupin sensor                       | T171C                      | -            |
| Pchs_03120 |             | sarcosine oxidase, monomeric form                                             | A309G                      | -            |
| Pchs_03121 |             | Predicted signal-transduction protein containing cAMP-binding and CBS domains | A115G                      | I39V         |
| Pchs_03130 | <i>scoB</i> | 3-oxoacid CoA-transferase subunit B                                           | A308G                      | D103G        |

|            |              |                                                                                                  |              |            |
|------------|--------------|--------------------------------------------------------------------------------------------------|--------------|------------|
| Pchs_05182 | <i>ectB</i>  | diaminobutyrate aminotransferase apoenzyme (EC 2.6.1.76)                                         | C107T        | S36L       |
| Pchs_05189 |              | Protein of unknown function (DUF3077)                                                            | C32T         | P11L       |
| Pchs_05193 | <i>pvdL</i>  | non-ribosomal peptide synthase domain TIGR01720/amino acid adenylation domain-containing protein | C8534T       | A2845V     |
| Pchs_05226 |              | EAL domain, c-di-GMP-specific phosphodiesterase class I (or its enzymatically inactive variant)  | G527A        | G176D      |
| Pchs_05228 | <i>shlB</i>  | hemolysin activation/secretion protein                                                           | G989A        | G330E      |
| Pchs_05229 | <i>shlA</i>  | hemolysin                                                                                        | G4149A       | -          |
| Pchs_05241 | <i>tpmT</i>  | thiopurine S-methyltransferase                                                                   | C344T        | A115V      |
| Pchs_05243 | <i>deaD</i>  | ATP-dependent RNA helicase DeaD                                                                  | C593T        | A198V      |
| Pchs_05248 |              | Uncharacterized conserved protein YjiS, DUF1127 family                                           | C56T         | S19F       |
| Pchs_05285 | <i>kdpE</i>  | two component transcriptional regulator, winged helix family                                     | C532T        | Q178TC     |
| Pchs_05294 |              | transcriptional regulator, GntR family                                                           | C92T         | A31V       |
| Pchs_05296 |              | hypothetical protein                                                                             | C508T        | L170F      |
| Pchs_05311 | <i>algA</i>  | mannose-1-phosphate guanylyltransferase / mannose-6-phosphate isomerase                          | G1057A       | V353I      |
| Pchs_05333 |              | ATP-binding cassette, subfamily C                                                                | G1192A       | A398T      |
| Pchs_05342 | <i>mmmC</i>  | tRNA 5-methylaminomethyl-2-thiouridine biosynthesis bifunctional protein                         | G525T        | -          |
| Pchs_05345 |              | GNAT-family acetyltransferase TIGR03103                                                          | C1598T       | A533V      |
| Pchs_05347 |              | hypothetical protein                                                                             | C166T        | P56S       |
| Pchs_05350 |              | hypothetical protein Pfl01_4107                                                                  | C13T         | -          |
| Pchs_05355 | <i>atuH</i>  | citronellyl-CoA synthetase                                                                       | G879A        | W293TC     |
| Pchs_05356 |              | Protein of unknown function (DUF3509)                                                            | C246T        | -          |
| Pchs_05361 | <i>aroC</i>  | chorismate synthase                                                                              | G95A         | -          |
| Pchs_05364 | <i>prmB</i>  | [LSU ribosomal protein L3P]-glutamine N5-methyltransferase                                       | G661A        | E221K      |
| Pchs_05365 |              | Nicotinamidase-related amidase                                                                   | C199T, C238T | H67Y, P80S |
| Pchs_05368 | <i>folE2</i> | GTP cyclohydrolase I                                                                             | C355T        | R119C      |
| Pchs_05370 | <i>gst</i>   | glutathione S-transferase                                                                        | G151A        | G51S       |
| Pchs_05380 |              | Uncharacterized membrane protein                                                                 | C387T        | -          |
| Pchs_05384 |              | hypothetical protein                                                                             | C605T        | A202V      |
| Pchs_05408 |              | Uncharacterized conserved protein                                                                | C453A        | N151K      |
| Pchs_05508 |              | hypothetical protein                                                                             | G67A         | V23L       |
| Pchs_05524 |              | hypothetical protein                                                                             | C60T         | -          |

|            |             |                                                                                                  |                                     |                     |
|------------|-------------|--------------------------------------------------------------------------------------------------|-------------------------------------|---------------------|
| Pchs_05525 | <i>astB</i> | succinylarginine dihydrolase                                                                     | C1020T                              | -                   |
| Pchs_05644 |             | hemoglobin/transferrin/lactoferrin receptor protein                                              | G2188A                              | A730T               |
| Pchs_05712 |             | methyl-accepting chemotaxis sensory transducer with Cache sensor                                 | C719T                               | T240I               |
| Pchs_05821 |             | Signal transduction histidine kinase                                                             | G1774A                              | A592T               |
| Pchs_05833 |             | transcriptional regulator, LuxR family                                                           | G254C                               | G85A                |
| Pchs_01728 |             | Sel1 repeat-containing protein                                                                   | G932A                               | -                   |
| Pchs_02029 |             | Beta-galactosidase                                                                               | G741A                               | W247TC              |
| Pchs_02056 |             | ATP-dependent helicase HepA                                                                      | C387T                               | -                   |
| Pchs_02081 |             | MFS transporter, DHA1 family, arabinose polymer transporter                                      | C433T                               | P145S               |
| Pchs_00576 | <i>pgk</i>  | phosphoglycerate kinase                                                                          | C488T                               | A163V               |
| Pchs_05069 |             | hypothetical protein                                                                             | C203T                               | P68L                |
| Pchs_05126 |             | hypothetical protein                                                                             | G467A                               | W156TC              |
| Pchs_05132 |             | Zn-binding Pro-Ala-Ala-Arg (PAAR) domain-containing protein, involved in Type VI secretion       | C172T                               | L58F                |
| Pchs_05134 |             | quinoxinone amine dehydrogenase, alpha subunit                                                   | C813T                               | -                   |
| Pchs_05147 |             | Nicotinamidase-related amidase                                                                   | G187A                               | V63I                |
| Pchs_05152 | <i>pvdI</i> | non-ribosomal peptide synthase domain TIGR01720/amino acid adenylation domain-containing protein | C505T                               | -                   |
| Pchs_04310 |             | Response regulator containing a CheY-like receiver domain and an HTH DNA-binding domain          | G19A,<br>A228C,<br>C448T            | A7T, E76D,<br>H150Y |
| Pchs_06597 |             | NAD(P)-dependent dehydrogenase, short-chain alcohol dehydrogenase family                         | G243A,<br>G248A,<br>A291G,<br>G587A | -                   |
| Pchs_06598 |             | FAD/FMN-containing dehydrogenase                                                                 | T678C                               | -                   |
| Pchs_00904 |             | LSU ribosomal protein L9P                                                                        | G425A                               | R142H               |
| Pchs_01095 |             | 3-hydroxybutyryl-CoA dehydrogenase                                                               | C799G                               | R267G               |
| Pchs_01388 | <i>lapA</i> | surface adhesion protein                                                                         | T12505A,<br>C12516T                 | S4169T              |
| Pchs_03375 |             | gamma-glutamylputrescine oxidase                                                                 | G888A                               | -                   |
| Pchs_03410 |             | sodium/proton antiporter, CPA1 family (TC 2.A.36)                                                | C745T                               | -                   |
| Pchs_03532 |             | ABC-type uncharacterized transport system involved in gliding motility, auxiliary component      | C549T                               | -                   |
| Pchs_03535 |             | hypothetical protein                                                                             | G912A                               | -                   |

|            |             |                                                                 |                           |                           |
|------------|-------------|-----------------------------------------------------------------|---------------------------|---------------------------|
| Pchs_03580 | <i>lspL</i> | UDP-glucuronate 4-epimerase                                     | G1024A                    | A342T                     |
| Pchs_03773 |             | hypothetical protein                                            | C221T                     | T74I                      |
| Pchs_03775 | <i>lhgO</i> | L-2-hydroxyglutarate oxidase                                    | C45T                      | -                         |
| Pchs_03878 | <i>lysP</i> | lysine:proton symporter, AAT family (TC 2.A.3.1.2)              | C957T                     | -                         |
| Pchs_03920 | <i>rocE</i> | arginine:proton symporter, AAT family (TC 2.A.3.1.11)           | G369A                     | W123TC                    |
| Pchs_03967 |             | TRAP transporter, DctM subunit                                  | G971A                     | G324D                     |
| Pchs_04127 |             | transposase, IS4 family                                         | G347A                     | R116H                     |
| Pchs_04140 |             | N-carbamoyl-L-amino-acid hydrolase                              | C799T                     | P267S                     |
| Pchs_04148 |             | putative copper resistance protein D                            | G687A                     | -                         |
| Pchs_04161 |             | Uncharacterized conserved protein, Alpha-E superfamily          | C183T                     | -                         |
| Pchs_04167 |             | Pimeloyl-ACP methyl ester carboxylesterase                      | G692A                     | W231TC                    |
| Pchs_04182 | <i>alkC</i> | 3-methyladenine DNA glycosylase AlkC                            | G788A                     | G263D                     |
| Pchs_04183 |             | conserved hypothetical protein                                  | G152A                     | R51Q                      |
| Pchs_04190 |             | epralysin. Metallo peptidase. MEROPS family M10B                | C725T                     | P242L                     |
| Pchs_04199 |             | transcriptional regulator, LysR family                          | G141A                     | -                         |
| Pchs_04208 |             | outer membrane autotransporter barrel domain-containing protein | G3392A                    | -                         |
| Pchs_04216 |             | NAD(P)H dehydrogenase (quinone)                                 | C402T                     | -                         |
| Pchs_04229 |             | membrane fusion protein, multidrug efflux system                | G916A,<br>G941A           | V306M,<br>S314N           |
| Pchs_04232 |             | transcriptional regulator, AraC family with amidase-like domain | C858T                     | -                         |
| Pchs_04234 |             | putative protease                                               | C1935T                    | -                         |
| Pchs_04247 |             | DNA-binding transcriptional regulator, LysR family              | C633T                     | -                         |
| Pchs_04255 |             | hypothetical protein                                            | C50T                      | A17V                      |
| Pchs_04262 | <i>rhtA</i> | Threonine/homoserine efflux transporter RhtA                    | G814A                     | D272N                     |
| Pchs_04273 |             | ribosomal protein S12 methylthiotransferase accessory factor    | G1279A                    | V427M                     |
| Pchs_04274 |             | tRNA (adenine22-N1)-methyltransferase                           | G241A                     | A81T                      |
| Pchs_00734 | <i>icmF</i> | type VI secretion system protein                                | G2935A                    | A979T                     |
| Pchs_01454 |             | Fructose-2,6-bisphosphatase                                     | G374A                     | G125D                     |
| Pchs_04312 |             | VCBS repeat-containing protein                                  | C604T,<br>G620A,<br>C670A | R207K,<br>N220K,<br>H224N |
| Pchs_04325 |             | hypothetical protein                                            | A284C                     | D95A                      |

|            |             |                                                   |        |        |
|------------|-------------|---------------------------------------------------|--------|--------|
| Pchs_04406 |             | transcriptional regulator, LuxR family            | G205A  | G69S   |
| Pchs_04407 | <i>ofaA</i> | arthrofactin-type cyclic lipopeptide synthetase A | T5677G | V1893G |

**Supplementary Table S2. All 452 proteins expressed differentially in mutant P3.**

<sup>a</sup> Expression fold change between two strains (mutant P3/control HT66), ratio > 1.5 represented upregulation, ratio < 0.7 represented downregulation.

| Protein description                                                                | Gene             | IMG locus tag_HT66 | NCBI GI_HT66 | Ratio <sup>a</sup> |
|------------------------------------------------------------------------------------|------------------|--------------------|--------------|--------------------|
| Predicted acyl-CoA transferases/carnitine dehydratase                              |                  | Pchs_00002         | 515074065    | 2.65               |
| Acyl-CoA dehydrogenases                                                            | <i>gcdH</i>      | Pchs_00003         | 647491551    | 2.19               |
| NAD/NADP transhydrogenase alpha subunit                                            | <i>pntA</i><br>A | Pchs_00005         | 515074066    | 0.67               |
| Uncharacterized conserved small protein                                            |                  | Pchs_00009         | 496332375    | 0.66               |
| cytochrome c oxidase, subunit II                                                   | <i>ctaC</i>      | Pchs_00060         | 496337085    | 0.67               |
| hypothetical protein [Pseudomonas chlororaphis]                                    |                  | Pchs_00079         | 647491723    | 0.45               |
| tryptophan synthase, beta chain (EC 4.2.1.20)                                      | <i>trpB</i>      | Pchs_00083         | 496337064    | 0.30               |
| tryptophan synthase, alpha chain (EC 4.2.1.20)                                     | <i>trpA</i>      | Pchs_00084         | 647491730    | 0.54               |
| chromosomal replication initiator protein DnaA                                     | <i>dnaA</i>      | Pchs_00118         | 647491804    | 0.66               |
| glucose-inhibited division protein A                                               | <i>gidA</i>      | Pchs_00122         | 647491816    | 0.67               |
| chromosome segregation DNA-binding protein                                         | <i>parB</i>      | Pchs_00125         | 647491821    | 0.63               |
| Predicted dehydrogenases and related proteins                                      |                  | Pchs_00143         | 647491911    | 0.39               |
| Cyclopropane fatty acid synthase and related methyltransferases                    |                  | Pchs_00181         | 647492002    | 0.50               |
| transcriptional regulator, RpiR family                                             |                  | Pchs_00207         | 495202810    | 0.66               |
| phosphate ABC transporter substrate-binding protein, PhoT family (TC 3.A.1.7.1)    | <i>pstS</i>      | Pchs_00239         | 495203739    | 0.37               |
| ABC-type uncharacterized transport system, permease component                      | <i>pstC</i>      | Pchs_00240         | 647492140    | 0.54               |
| phosphate ABC transporter, permease protein PstA                                   | <i>pstA</i>      | Pchs_00241         | 496342427    | 0.58               |
| phosphate ABC transporter ATP-binding protein, PhoT family (TC 3.A.1.7.1)          | <i>pstB</i>      | Pchs_00242         | 496342426    | 0.54               |
| phosphate uptake regulator, PhoU                                                   | <i>phoU</i>      | Pchs_00243         | 495203747    | 0.65               |
| phosphate regulon transcriptional regulatory protein PhoB                          | <i>phoB</i>      | Pchs_00249         | 495171678    | 0.65               |
| Uncharacterized protein conserved in bacteria                                      |                  | Pchs_00250         | 647492159    | 0.59               |
| type VI secretion protein, VC_A0107 family                                         | <i>tssB</i>      | Pchs_00257         | 495205505    | 2.09               |
| type VI secretion protein, EvpB/VC_A0108 family                                    | <i>tssC</i>      | Pchs_00258         | 495205504    | 2.22               |
| type VI secretion protein, VC_A0110 family                                         | <i>tssF</i>      | Pchs_00265         | 647492201    | 2.50               |
| type VI secretion ATPase, ClpV1 family                                             | <i>clpV</i>      | Pchs_00267         | 647492206    | 1.77               |
| type VI secretion protein, VC_A0114 family                                         | <i>tssK</i>      | Pchs_00272         | 495205486    | 1.74               |
| type IV / VI secretion system protein, DotU family                                 | <i>tssL</i>      | Pchs_00273         | 647492220    | 1.65               |
| type VI secretion protein IcmF                                                     | <i>tssM</i>      | Pchs_00274         | 647492224    | 1.99               |
| Transcriptional regulator, oxyR LysR family<br>transcriptional regulator, hydrogen | <i>oxyR</i>      | Pchs_00285         | 647492247    | 0.67               |



|                                                                                                                                            |               |            |           |       |
|--------------------------------------------------------------------------------------------------------------------------------------------|---------------|------------|-----------|-------|
| peroxide-inducible genes activator                                                                                                         |               |            |           |       |
| outer membrane transport energization protein ExbB (TC 2.C.1.1.1)                                                                          | <i>exbB 1</i> | Pchs_00288 | 647492252 | 1.95  |
| rpoZ DNA-directed RNA polymerase subunit omega (EC 2.7.7.6)                                                                                | <i>rpoZ</i>   | Pchs_00293 | 495196339 | 0.66  |
| hypothetical protein [Pseudomonas]                                                                                                         |               |            | 495196536 | 0.60  |
| Predicted enzyme of the cupin superfamily                                                                                                  |               | Pchs_00308 | 647492291 | 0.50  |
| Transcriptional regulators containing a DNA-binding HTH domain and an aminotransferase domain (MocR family) and their eukaryotic orthologs |               | Pchs_00312 | 647492301 | 0.39  |
| Glycine/D-amino acid oxidases (deaminating)                                                                                                |               | Pchs_00317 | 647492310 | 3.53  |
| Cytochrome c5                                                                                                                              |               | Pchs_00321 | 496336996 | 0.64  |
| nitrogen regulatory protein P-II family                                                                                                    | <i>glnK</i>   | Pchs_00342 | 488618959 | 2.25  |
| adenylate cyclase                                                                                                                          | <i>cyaA</i>   | Pchs_00356 | 647492483 | 4.64  |
| amino acid ABC transporter substrate-binding protein, PAAT family (TC 3.A.1.3.-)                                                           |               | Pchs_00385 | 647492551 | 5.6   |
| hypothetical protein                                                                                                                       |               | Pchs_00414 | 647492615 | 0.29  |
| Domain of unknown function (DUF4399)                                                                                                       |               |            | 496342187 | 0.60  |
| Phosphoglycerate dehydrogenase and related dehydrogenases                                                                                  | <i>serA</i>   | Pchs_00455 | 495208070 | 0.43  |
| IAP aminopeptidase. Metallo peptidase. MEROPS family M28C                                                                                  | <i>papB</i>   | Pchs_00460 | 647492691 | 5.13  |
| Protein of unknown function (DUF2868)                                                                                                      |               | Pchs_00480 | 647492739 | 5.06  |
| hypothetical protein                                                                                                                       |               | Pchs_00492 | 647492777 | 1.80  |
| NAD-dependent aldehyde dehydrogenases                                                                                                      | <i>calB</i>   | Pchs_00493 | 647492779 | 1.56  |
| Domain of unknown function (DUF4426)                                                                                                       |               | Pchs_00514 | 495196403 | 0.61  |
| Uncharacterized conserved protein                                                                                                          |               | Pchs_00557 | 495207754 | 1.53  |
| adenosylhomocysteinase (EC 3.3.1.1)                                                                                                        | <i>ahcY</i>   | Pchs_00562 | 496336815 | 0.60  |
| diguanylate cyclase (GGDEF) domain                                                                                                         |               | Pchs_00581 | 647492989 | 0.32  |
| choline dehydrogenase (EC 1.1.99.1)                                                                                                        | <i>betA</i>   | Pchs_00592 | 647493019 | 0.62  |
| betaine aldehyde dehydrogenase (EC 1.2.1.8)                                                                                                | <i>betB</i>   | Pchs_00593 | 647493021 | 0.49  |
| Uncharacterized protein conserved in bacteria                                                                                              |               | Pchs_00613 | 647493058 | 0.63  |
| Fe-S oxidoreductase                                                                                                                        |               | Pchs_00618 | 647493074 | 0.45  |
| TonB-dependent siderophore receptor                                                                                                        | <i>fhuA</i>   | Pchs_00644 | 647493125 | 15.86 |
| Glycine cleavage system regulatory protein                                                                                                 |               | Pchs_00651 | 495201266 | 0.55  |
| Acyl-CoA dehydrogenases                                                                                                                    |               | Pchs_00663 | 647493174 | 0.63  |
| lysine 2-monooxygenase (EC 1.13.12.2)                                                                                                      |               | Pchs_00681 | 647493223 | 1.77  |
| Alcohol dehydrogenase, class IV                                                                                                            |               | Pchs_00715 | 647493337 | 1.72  |
| anthranilate synthase component I, non-proteobacterial lineages                                                                            | <i>trpE</i>   | Pchs_00718 | 647493343 | 0.67  |
| nucleoside ABC transporter ATP-binding protein                                                                                             |               | Pchs_00761 | 647494590 | 4.34  |
| nucleoside-binding protein                                                                                                                 |               | Pchs_00770 | 647494616 | 4.34  |

|                                                                                              |              |            |           |      |
|----------------------------------------------------------------------------------------------|--------------|------------|-----------|------|
| hypothetical protein [Pseudomonas chlororaphis]                                              |              | Pchs_00780 | 647494638 | 0.60 |
| Hemolysin activation/secretion protein                                                       |              | Pchs_00789 | 647494658 | 1.64 |
| Uncharacterized protein conserved in bacteria                                                |              | Pchs_00842 | 647494792 | 1.73 |
| TonB-dependent copper receptor                                                               | <i>oprC</i>  | Pchs_00844 | 647494796 | 1.99 |
| urea ABC transporter, ATP-binding protein UrtD                                               | <i>urtD</i>  | Pchs_00853 | 647494818 | 2.48 |
| urease. Metallo peptidase. MEROPS family M38<br>ureC urease subunit alpha [EC:3.5.1.5]       | <i>ureC</i>  | Pchs_00860 | 647494842 | 1.83 |
| Urease accessory protein UreE                                                                | <i>ureE</i>  | Pchs_00876 | 647494888 | 2.64 |
| urease accessory protein UreG                                                                | <i>ureG</i>  | Pchs_00878 | 496337543 | 2.79 |
| Short-chain alcohol dehydrogenase of unknown<br>specificity                                  |              | Pchs_00882 | 495200436 | 0.51 |
| amino acid/amide ABC transporter ATP-binding<br>protein 2, HAAT family (TC 3.A.1.4.-)        | <i>livF</i>  | Pchs_00883 | 496337539 | 3.21 |
| amino acid/amide ABC transporter ATP-binding<br>protein 1, HAAT family (TC 3.A.1.4.-)        | <i>livG</i>  | Pchs_00884 | 565889081 | 3.35 |
| amino acid/amide ABC transporter<br>substrate-binding protein, HAAT family (TC<br>3.A.1.4.-) | <i>livJ</i>  | Pchs_00887 | 496337535 | 3.50 |
| azurin                                                                                       | <i>azu</i>   | Pchs_00893 | 496337529 | 0.55 |
| ADP-ribose pyrophosphatase                                                                   |              | Pchs_00897 | 647494936 | 1.73 |
| Uncharacterized protein conserved in bacteria                                                |              | Pchs_00900 | 647494946 | 2.44 |
| Oligoribonuclease (3'->5' exoribonuclease)                                                   | <i>orn</i>   | Pchs_00928 | 647495064 | 0.65 |
| Uncharacterized protein conserved in bacteria                                                |              | Pchs_00937 | 647495082 | 0.70 |
| thioredoxin                                                                                  |              | Pchs_00994 | 647495226 | 0.66 |
| Uncharacterized protein conserved in bacteria                                                |              | Pchs_01042 | 496332636 | 0.51 |
| poly(hydroxyalkanoate) granule-associated protein                                            |              | Pchs_01047 | 647495374 | 0.60 |
| poly(hydroxyalkanoate) granule-associated protein                                            | <i>PhaI</i>  | Pchs_01048 | 647495377 | 0.55 |
| Methyl-accepting chemotaxis protein                                                          |              | Pchs_01059 | 647495401 | 0.18 |
| urocanate hydratase (EC 4.2.1.49)                                                            | <i>hutU</i>  | Pchs_01076 | 515074600 | 1.67 |
| histidine utilization repressor, proteobacterial                                             | <i>hutC</i>  | Pchs_01078 | 647495443 | 0.63 |
| formimidoylglutamate deiminase (EC 3.5.3.13)                                                 | <i>hutF</i>  | Pchs_01079 | 647495445 | 0.53 |
| glycogen/starch/alpha-glucan phosphorylases                                                  | <i>glgP</i>  | Pchs_01085 | 647495459 | 3.25 |
| L-glutamine synthetase (EC 6.3.1.2)                                                          | <i>glnA</i>  | Pchs_01089 | 647495467 | 3.05 |
| nitrogen regulation protein NR(I)                                                            | <i>glnG</i>  | Pchs_01102 | 647495504 | 4.04 |
| Membrane-bound metallopeptidase                                                              |              | Pchs_01110 | 647495517 | 0.65 |
| amino acid ABC transporter substrate-binding<br>protein, PAAT family (TC 3.A.1.3.-)          |              | Pchs_01130 | 496337335 | 1.62 |
| hypothetical protein                                                                         |              | Pchs_01164 | 647495647 | 0.43 |
| hypothetical protein [Pseudomonas chlororaphis]                                              |              | Pchs_01166 | 647495649 | 0.64 |
| DNA-methyltransferase (dcm)                                                                  |              | Pchs_01187 | 647495708 | 0.63 |
| ADP-ribose pyrophosphatase                                                                   | <i>nudeE</i> | Pchs_01218 | 495206934 | 0.64 |
| BON domain/LysM domain                                                                       |              | Pchs_01220 | 496332538 | 0.52 |
| L-cystine ABC transporter ATP-binding                                                        |              | Pchs_01264 | 647495903 | 0.64 |

|                                                                                  |                |            |           |      |
|----------------------------------------------------------------------------------|----------------|------------|-----------|------|
| protein/Diaminopimelate ABC transporter ATP-binding protein                      |                |            |           |      |
| RND family efflux transporter, MFP subunit                                       |                | Pchs_01274 | 647495933 | 1.60 |
| ABC-type metal ion transport system, periplasmic component/surface antigen       |                | Pchs_01282 | 647495948 | 0.59 |
| type VI secretion system effector, Hcp1 family                                   | <i>hcpA</i>    | Pchs_01292 | 495200970 | 1.59 |
| 5-aminovalerate transaminase (EC 2.6.1.48)                                       | <i>gabT</i>    | Pchs_01325 | 496332446 | 1.58 |
| hypothetical protein [Pseudomonas chlororaphis]                                  |                | Pchs_01330 | 647496042 | 2.14 |
| Aspartyl/asparaginyl beta-hydroxylase and related dioxygenases                   |                | Pchs_01362 | 647496100 | 0.67 |
| type I secretion C-terminal target domain (VC_A0849 subclass)                    | <i>lapA</i>    | Pchs_01388 | 647496163 | 1.72 |
| pyocin immunity protein [Pseudomonas chlororaphis]                               |                |            | 647496769 | 0.66 |
| methylmalonate-semialdehyde dehydrogenase [acylating] (EC 1.2.1.27)              | <i>mms A-2</i> | Pchs_01422 | 647499383 | 2.34 |
| 3-hydroxyisobutyrate dehydrogenase (EC 1.1.1.31)                                 | <i>mms B</i>   | Pchs_01423 | 647499387 | 1.70 |
| anthranilate dioxygenase, alpha subunit                                          | <i>antA</i>    | Pchs_01433 | 647499410 | 1.51 |
| Kynureninase (EC 3.7.1.3)                                                        | <i>kynU</i>    | Pchs_01436 | 647499417 | 1.88 |
| gamma-glutamyltransferase 1 (EC:2.3.2.2). Threonine peptidase. MEROPS family T03 | <i>ggt</i>     | Pchs_01444 | 647499437 | 2.58 |
| Spermidine/putrescine-binding periplasmic protein                                | <i>potF</i>    | Pchs_01465 | 647499488 | 1.54 |
| FAD/FMN-containing dehydrogenases                                                |                | Pchs_01478 | 647499515 | 1.64 |
| transcriptional regulator, GntR family                                           | <i>pdhR</i>    | Pchs_01483 | 496337740 | 0.66 |
| Fe <sup>2+</sup> /Zn <sup>2+</sup> uptake regulation proteins                    | <i>fur</i>     | Pchs_01489 | 495196050 | 0.66 |
| carbamoyl-phosphate synthase small subunit                                       | <i>carA</i>    | Pchs_01497 | 647499558 | 0.64 |
| transcription elongation factor GreA                                             | <i>greA</i>    | Pchs_01499 | 647499565 | 0.58 |
| Uncharacterized protein conserved in bacteria                                    |                | Pchs_01509 | 496332949 | 0.50 |
| tRNA pseudouridine synthase B (EC 4.2.1.70)                                      | <i>truB</i>    | Pchs_01513 | 495196094 | 0.67 |
| acetoacetyl-CoA synthase                                                         | <i>acsA _1</i> | Pchs_01546 | 647499663 | 2.42 |
| 3-hydroxybutyrate dehydrogenase                                                  | <i>bdhA</i>    | Pchs_01547 | 647499665 | 4.50 |
| ppiC Parvulin-like peptidyl-prolyl isomerase                                     | <i>ppiC _1</i> | Pchs_01554 | 495199663 | 0.68 |
| thioredoxin [Pseudomonas chlororaphis]                                           |                |            | 647490025 | 0.46 |
| TonB-dependent siderophore receptor                                              | <i>piuA</i>    | Pchs_01589 | 647490308 | 8.56 |
| Uncharacterized iron-regulated protein                                           |                | Pchs_01590 | 647490310 | 2.18 |
| Diaminopimelate decarboxylase                                                    | <i>speC</i>    | Pchs_01592 | 647490314 | 1.61 |
| ABC-type dipeptide transport system, periplasmic component                       | <i>dppA _1</i> | Pchs_01603 | 647490337 | 1.78 |
| outer membrane porin, OprD family                                                | <i>OprD</i>    | Pchs_01604 | 647490339 | 3.10 |
| ABC-type dipeptide transport system, periplasmic                                 | <i>dppA</i>    | Pchs_01605 | 647490341 | 2.02 |

|                                                                                                                                    |               |            |           |      |
|------------------------------------------------------------------------------------------------------------------------------------|---------------|------------|-----------|------|
| component                                                                                                                          | _2            |            |           |      |
| aspartyl/glutamyl-tRNA (Asn/Gln) amidotransferase subunit A (EC 6.3.5.-)                                                           | <i>gatA</i>   | Pchs_01624 | 647490384 | 0.61 |
| fumarase, class II (EC 4.2.1.2)                                                                                                    | <i>fumC_1</i> | Pchs_01637 | 647490465 | 5.57 |
| ABC-type transport system involved in resistance to organic solvents, auxiliary component, ttg2 putative toluene tolerance protein | <i>ttg2D</i>  | Pchs_01654 | 647490488 | 0.69 |
| Flavodoxins                                                                                                                        |               | Pchs_01682 | 515071874 | 0.61 |
| TonB-dependent siderophore receptor                                                                                                | <i>fecA</i>   | Pchs_01712 | 647490614 | 1.67 |
| Domain of unknown function (DUF4123)                                                                                               |               | Pchs_01732 | 647490661 | 0.53 |
| hypothetical protein [Pseudomonas]                                                                                                 |               | Pchs_01733 | 495205272 | 0.52 |
| hypothetical protein [Pseudomonas chlororaphis]                                                                                    |               | Pchs_01734 | 647490664 | 0.43 |
| Predicted ATPase related to phosphate starvation-inducible protein PhoH                                                            |               | Pchs_01752 | 496337918 | 2.41 |
| Predicted esterase                                                                                                                 | <i>estB</i>   | Pchs_01761 | 647490726 | 0.57 |
| amino acid ABC transporter substrate-binding protein, PAAT family (TC 3.A.1.3.-)                                                   | <i>aapJ</i>   | Pchs_01762 | 647490729 | 7.84 |
| amino acid ABC transporter membrane protein 1, PAAT family (TC 3.A.1.3.-)                                                          | <i>aapQ</i>   | Pchs_01763 | 647490732 | 2.49 |
| amino acid ABC transporter ATP-binding protein, PAAT family (TC 3.A.1.3.-)                                                         | <i>aapP</i>   | Pchs_01765 | 496337929 | 4.70 |
| NADH:flavin oxidoreductases, Old Yellow Enzyme family                                                                              | <i>xenA</i>   | Pchs_01827 | 647490887 | 0.56 |
| Chemotaxis protein histidine kinase and related kinases                                                                            |               | Pchs_01847 | 647490936 | 0.57 |
| bacterial peptide chain release factor 2 (bRF-2)                                                                                   | <i>prfB</i>   | Pchs_01850 | 515075469 | 0.57 |
| periplasmic chaperone for outer membrane proteins Skp                                                                              |               | Pchs_01900 | 495199277 | 0.60 |
| acetyl-CoA carboxylase carboxyltransferase subunit alpha                                                                           | <i>accA</i>   | Pchs_01907 | 495199263 | 0.57 |
| Negative regulator of beta-lactamase expression                                                                                    | <i>amiD</i>   | Pchs_01929 | 647491106 | 0.19 |
| Flavodoxin reductases (ferredoxin-NADPH reductases) family                                                                         | <i>fpr_1</i>  | Pchs_01981 | 495199142 | 0.66 |
| Acetyltransferases                                                                                                                 |               | Pchs_01986 | 647491222 | 0.62 |
| Protein of unknown function, DUF481                                                                                                |               | Pchs_02006 | 647491261 | 0.64 |
| amino acid ABC transporter ATP-binding protein, PAAT family (TC 3.A.1.3.-)                                                         | <i>hisP</i>   | Pchs_02011 | 647491334 | 1.58 |
| amino acid ABC transporter substrate-binding protein, PAAT family (TC 3.A.1.3.-)                                                   | <i>hisJ</i>   | Pchs_02015 | 496338179 | 1.65 |
| hypothetical protein [Pseudomonas chlororaphis]                                                                                    |               |            | 496338965 | 2.14 |
| Pyridoxamine 5'-phosphate oxidase (EC 1.4.3.5)                                                                                     | <i>pdxH</i>   | Pchs_02032 | 647491381 | 0.57 |
| L-leucine-binding protein/L-isoleucine-binding                                                                                     | <i>braC</i>   | Pchs_02049 | 647491415 | 1.66 |

|                                                                                                             |               |            |           |      |
|-------------------------------------------------------------------------------------------------------------|---------------|------------|-----------|------|
| protein/L-valine-binding protein                                                                            |               |            |           |      |
| 3-hydroxyisobutyrate dehydrogenase and related beta-hydroxyacid dehydrogenases                              |               | Pchs_02052 | 647491422 | 0.68 |
| NADH:flavin oxidoreductases, Old Yellow Enzyme family                                                       | <i>xenB</i>   | Pchs_02080 | 647491477 | 0.57 |
| Phosphatidylserine/phosphatidylglycerophosphate/cardiolipin synthases and related enzymes                   |               | Pchs_02094 | 647491511 | 1.77 |
| Dihydrodipicolinate synthase/N-acetylneuraminatase lyase                                                    | <i>dapA</i>   | Pchs_02172 | 647483598 | 0.40 |
| Inclusion body protein                                                                                      |               | Pchs_02183 | 647483633 | 0.52 |
| Protein of unknown function (DUF2971)                                                                       |               | Pchs_02197 | 647483663 | 0.49 |
| Acetyltransferases, including N-acetylases of ribosomal proteins                                            |               | Pchs_02198 | 647483665 | 0.41 |
| hypothetical protein [Pseudomonas chlororaphis]                                                             |               | Pchs_02220 | 647486676 | 0.68 |
| Predicted hydrolases or acyltransferases (alpha/beta hydrolase superfamily)                                 |               | Pchs_02231 | 496338294 | 0.25 |
| periplasmic serine protease, Do/DeqQ family                                                                 | <i>mucD</i>   | Pchs_02253 | 647486746 | 0.62 |
| DNA gyrase inhibitor                                                                                        |               | Pchs_02349 | 647486984 | 0.56 |
| type I secretion membrane fusion protein, HlyD family                                                       | <i>lapC</i>   | Pchs_02366 | 647487032 | 2.19 |
| type I secretion system ATPase, LssB family                                                                 | <i>lapB</i>   | Pchs_02367 | 647487034 | 2.33 |
| type I secretion outer membrane protein, TolC family                                                        | <i>lapE</i>   | Pchs_02368 | 647487037 | 2.90 |
| VCBS repeat/type I secretion C-terminal target domain (VC_A0849 subclass)                                   | <i>lapA</i>   | Pchs_02369 | 647487039 | 2.66 |
| leucyl aminopeptidase [Pseudomonas chlororaphis]                                                            |               | Pchs_02398 | 647487111 | 0.49 |
| Flagellar basal-body P-ring protein                                                                         | <i>flgI</i>   | Pchs_02412 | 647487141 | 0.47 |
| CDP-glucose 4,6-dehydratase                                                                                 | <i>rfgG</i>   | Pchs_02418 | 647487156 | 0.29 |
| UDP-N-acetylglucosamine 4,6-dehydratase                                                                     | <i>wbjB</i>   | Pchs_02425 | 647487176 | 0.57 |
| pseudaminic acid CMP-transferase                                                                            | <i>pseF</i>   | Pchs_02427 | 647487181 | 0.63 |
| 3-oxoacyl-[acyl-carrier-protein] synthase III                                                               | <i>fabH_2</i> | Pchs_02430 | 647487188 | 0.53 |
| fliC Flagellin and related hook-associated proteins                                                         | <i>fliC</i>   | Pchs_02433 | 647487196 | 0.11 |
| flagellar biosynthetic protein FliS                                                                         | <i>fliS</i>   | Pchs_02436 | 495197853 | 0.32 |
| flagellar motor switch protein FliG                                                                         | <i>fliG</i>   | Pchs_02443 | 495197841 | 0.40 |
| FOG: HPt domain                                                                                             |               | Pchs_02449 | 647487222 | 0.52 |
| ATPases involved in chromosome partitioning                                                                 | <i>fleN</i>   | Pchs_02461 | 647487254 | 0.65 |
| RNA polymerase, sigma 28 subunit, SigD/FliA/WhiG fliA RNA polymerase sigma factor for flagellar operon FliA | <i>fliA</i>   | Pchs_02462 | 495197716 | 0.49 |
| Response regulator containing CheY-like receiver, AAA-type ATPase, and DNA-binding domains                  | <i>cheY</i>   | Pchs_02463 | 498142783 | 0.19 |

|                                                                                                  |                   |            |           |      |
|--------------------------------------------------------------------------------------------------|-------------------|------------|-----------|------|
| Chemotaxis protein                                                                               | <i>cheZ</i>       | Pchs_02464 | 496333571 | 0.31 |
| Chemotaxis protein histidine kinase and related kinases cheA                                     | <i>cheA</i>       | Pchs_02465 | 647487264 | 0.22 |
| Chemotaxis response regulator containing a CheY-like receiver domain and a methylesterase domain | <i>cheB</i>       | Pchs_02466 | 647487268 | 0.36 |
| ATPases involved in chromosome partitioning                                                      |                   | Pchs_02469 | 495197709 | 0.52 |
| Chemotaxis signal transduction protein                                                           | <i>cheW</i>       | Pchs_02471 | 495197707 | 0.15 |
| GDSL-like Lipase/Acylhydrolase family                                                            |                   | Pchs_02502 | 647487349 | 0.56 |
| hypothetical protein                                                                             |                   | Pchs_02503 | 647487351 | 0.25 |
| Predicted carbamoyl transferase, NodU family                                                     |                   | Pchs_02506 | 647487358 | 0.33 |
| Methionyl-tRNA formyltransferase                                                                 |                   | Pchs_02509 | 647487362 | 0.50 |
| citrate synthase (EC 2.3.3.1)                                                                    | <i>glcA</i>       | Pchs_02520 | 496338587 | 3.05 |
| Methyl-accepting chemotaxis protein                                                              |                   | Pchs_02545 | 647487424 | 0.49 |
| hypothetical protein                                                                             |                   | Pchs_02623 | 647483845 | 0.47 |
| Nucleoside-binding outer membrane protein                                                        | <i>Tsx</i>        | Pchs_02673 | 647483979 | 1.94 |
| Purine nucleoside permease                                                                       |                   | Pchs_02674 | 647483981 | 2.56 |
| L-arginine-binding protein/L-ornithine-binding protein                                           | <i>aotJ</i>       | Pchs_02692 | 496339016 | 1.67 |
| Acetylornithine deacetylase/Succinyl-diaminopimelate desuccinylase and related deacylases        | <i>argE</i><br>2  | Pchs_02707 | 647484051 | 1.70 |
| hypothetical protein                                                                             |                   | Pchs_02712 | 647484063 | 0.34 |
| TonB-dependent siderophore receptor                                                              |                   | Pchs_02718 | 647484077 | 1.65 |
| Acyl-CoA dehydrogenases                                                                          |                   | Pchs_02730 | 647484099 | 0.65 |
| haloacid dehalogenase superfamily, subfamily IA, variant 3 with third motif having DD or ED      |                   | Pchs_02732 | 647484104 | 0.64 |
| Domain of unknown function (DUF1842)/Domain of unknown function (DUF1843)                        |                   | Pchs_02737 | 647484112 | 2.27 |
| Domain of unknown function (DUF1842)/Domain of unknown function (DUF1843)                        |                   | Pchs_02738 | 647484114 | 1.9  |
| Y_X(10)_GDL-associated radical SAM protein                                                       | <i>nirJ</i>       | Pchs_02739 | 647484117 | 1.91 |
| beta-ketoacyl-acyl-carrier-protein synthase II                                                   | <i>fabF</i><br>_2 | Pchs_02742 | 647484125 | 0.41 |
| threonyl-tRNA synthetase (EC 6.1.1.3)                                                            | <i>thrS</i>       | Pchs_02767 | 647484335 | 0.57 |
| chitinase family 18 (EC:3.2.1.14)                                                                | <i>chiC</i>       | Pchs_02788 | 647484393 | 0.12 |
| chitin-binding protein                                                                           |                   | Pchs_02789 | 647484396 | 0.08 |
| acetyl-CoA carboxylase carboxyltransferase subunit alpha                                         | <i>accD</i>       | Pchs_02808 | 647484424 | 0.67 |
| transcription-repair coupling factor                                                             | <i>mfd</i>        | Pchs_02867 | 647484573 | 0.67 |
| 3-ketoacyl-CoA thiolase (EC 2.3.1.16)                                                            | <i>fadA</i>       | Pchs_02879 | 496338784 | 0.59 |
| short chain enoyl-CoA hydratase (EC 4.2.1.17)<br>/3-hydroxyacyl-CoA dehydrogenase (EC 1.1.1.35)  | <i>fadB</i>       | Pchs_02880 | 647484600 | 0.62 |

|                                                                                                            |              |            |           |       |
|------------------------------------------------------------------------------------------------------------|--------------|------------|-----------|-------|
| methyl-accepting chemotaxis sensory transducer with Pas/Pac sensor                                         | <i>aer-2</i> | Pchs_02893 | 647484628 | 0.45  |
| cAMP-binding proteins - catabolite gene activator and regulatory subunit of cAMP-dependent protein kinases | <i>Anr</i>   | Pchs_02911 | 496338758 | 0.43  |
| DNA ligase, NAD-dependent                                                                                  | <i>ligA</i>  | Pchs_02927 | 647484695 | 0.62  |
| ABC-type nitrate/sulfonate/bicarbonate transport systems, periplasmic components                           | <i>nrtA</i>  | Pchs_02944 | 647484724 | 2.81  |
| assimilatory nitrite reductase (NAD(P)H) large subunit precursor (EC 1.7.1.4)                              | <i>nasR</i>  | Pchs_02949 | 647484728 | 3.23  |
| RNA polymerase sigma factor, sigma-70 family                                                               | <i>sigX</i>  | Pchs_02954 | 647484734 | 0.64  |
| RraA family                                                                                                |              | Pchs_02958 | 495202726 | 0.60  |
| Hydantoin racemase                                                                                         |              | Pchs_02976 | 647484766 | 1.64  |
| ribosomal large subunit pseudouridine synthase C (EC 5.4.99.24)                                            | <i>rluC</i>  | Pchs_03044 | 647484926 | 0.68  |
| Aerobic-type carbon monoxide dehydrogenase, large subunit CoxL/CutL homologs                               | <i>iorB</i>  | Pchs_03049 | 647484937 | 0.65  |
| Methyltransferase domain                                                                                   |              | Pchs_03081 | 647485012 | 1.53  |
| Terpene synthase family, metal binding domain                                                              |              | Pchs_03082 | 647485014 | 3.23  |
| hypothetical protein [Pseudomonas chlororaphis]                                                            |              |            | 647485471 | 0.66  |
| hypothetical protein [Pseudomonas chlororaphis]                                                            |              |            | 647485614 | 0.37  |
| hypothetical protein [Pseudomonas chlororaphis]                                                            |              |            | 647485694 | 0.22  |
| hypothetical protein [Pseudomonas chlororaphis]                                                            |              |            | 647485711 | 0.67  |
| hypothetical protein [Pseudomonas chlororaphis]                                                            |              |            | 647485737 | 0.61  |
| hypothetical protein [Pseudomonas chlororaphis]                                                            |              |            | 647485782 | 0.54  |
| 3-oxoacid CoA-transferase, A subunit ScoA                                                                  | <i>scoA</i>  | Pchs_03129 | 495195793 | 71.60 |
| 3-oxoacid CoA-transferase, B subunit ScoB                                                                  | <i>scoB</i>  | Pchs_03130 | 495195791 | 7.49  |
| acetyl-CoA acetyltransferase (EC 2.3.1.9)                                                                  | <i>atoB</i>  | Pchs_03131 | 647487719 | 9.64  |
| Uncharacterized conserved protein                                                                          |              | Pchs_03157 | 496340180 | 0.63  |
| molybdenum ABC transporter, periplasmic molybdate-binding protein                                          | <i>modA</i>  | Pchs_03162 | 647496278 | 1.55  |
| 4-hydroxyphenylpyruvate dioxygenase (EC 1.13.11.27)                                                        | <i>hpd</i>   | Pchs_03189 | 515072615 | 1.50  |
| transcriptional regulator, LysR family                                                                     |              | Pchs_03193 | 647496340 | 0.64  |
| Acyl-CoA synthetases (AMP-forming)/AMP-acid ligases II                                                     |              | Pchs_03195 | 647496344 | 0.64  |
| 2, 4-dihydroxyhept-2-enedioate aldolase (EC 4.1.2.-)                                                       | <i>hpaI</i>  | Pchs_03199 | 515072622 | 1.75  |
| Amidasases related to nicotinamidase                                                                       |              | Pchs_03238 | 647496421 | 0.68  |
| Uncharacterized protein conserved in bacteria                                                              |              | Pchs_03280 | 647496507 | 0.15  |
| chitinase family 18 (EC:3.2.1.14)                                                                          | <i>chiC</i>  | Pchs_03281 | 647496510 | 0.20  |
| Acetyl-CoA acetyltransferase                                                                               |              | Pchs_03284 | 647496514 | 1.53  |
| outer membrane autotransporter barrel                                                                      | <i>pspA</i>  | Pchs_03329 | 647496602 | 2.95  |

|                                                                                            |                          |            |           |       |
|--------------------------------------------------------------------------------------------|--------------------------|------------|-----------|-------|
| domain/autotransporter-associated beta strand repeat                                       |                          |            |           |       |
| outer membrane autotransporter barrel domain/autotransporter-associated beta strand repeat | <i>pspB</i>              | Pchs_03330 | 647496604 | 1.66  |
| Uncharacterized conserved protein                                                          |                          | Pchs_03366 | 647496683 | 0.41  |
| TonB-dependent siderophore receptor                                                        |                          | Pchs_03383 | 647496719 | 4.50  |
| diaminobutyrate aminotransferase apoenzyme (EC 2.6.1.76)                                   | <i>acsF</i>              | Pchs_03384 | 647496722 | 13.41 |
| Siderophore synthetase component (Achromobactin biosynthetic protein AcsD)                 | <i>acsD</i>              | Pchs_03385 | 647496724 | 4.28  |
| Siderophore synthetase component                                                           | <i>acsA</i>              | Pchs_03390 | 647496739 | 7.35  |
| ABC-type cobalamin/Fe <sup>3+</sup> -siderophores transport systems, ATPase components     | <i>fepC</i>              | Pchs_03394 | 647496750 | 2.85  |
| Demethylmenaquinone methyltransferase                                                      |                          | Pchs_03396 | 647496754 | 2.32  |
| hypothetical protein                                                                       |                          | Pchs_03400 | 647496767 | 0.65  |
| diguanylate cyclase (GGDEF) domain                                                         | <i>wspR</i>              | Pchs_03415 | 647496806 | 0.63  |
| Choline dehydrogenase and related flavoproteins                                            | <i>betA</i>              | Pchs_03454 | 647496910 | 1.50  |
| Phosphatidylserine/phosphatidylglycerophosphate/cardiolipin synthases and related enzymes  |                          | Pchs_03455 | 647496912 | 0.64  |
| 5'-nucleotidase, lipoprotein e (P4) family                                                 |                          | Pchs_03462 | 647496922 | 1.75  |
| ABC-type dipeptide transport system, periplasmic component                                 |                          | Pchs_03467 | 647496930 | 1.54  |
| hypothetical protein                                                                       |                          | Pchs_03487 | 647496973 | 0.43  |
| hypothetical protein [ <i>Pseudomonas chlororaphis</i> ]                                   |                          | Pchs_03495 | 565883881 | 0.14  |
| Amidases related to nicotinamidase Isochorismatase-like                                    |                          | Pchs_03513 | 647497037 | 0.60  |
| Glycosyltransferases involved in cell wall biogenesis                                      | <i>arnC</i>              | Pchs_03538 | 647497098 | 0.62  |
| nucleotide sugar dehydrogenase                                                             |                          | Pchs_03544 | 496339793 | 0.66  |
| Acyl-CoA dehydrogenases                                                                    |                          | Pchs_03562 | 647497157 | 1.95  |
| short chain enoyl-CoA hydratase (EC 4.2.1.17)                                              | <i>fadB</i><br><i>1x</i> | Pchs_03563 | 647497158 | 1.56  |
| acetyl-CoA acetyltransferases                                                              |                          | Pchs_03565 | 647497160 | 1.57  |
| Acyl-coenzyme A synthetases/AMP-(fatty) acid ligases                                       |                          | Pchs_03567 | 647497165 | 2.74  |
| TonB-dependent siderophore receptor                                                        |                          | Pchs_03569 | 647497170 | 3.11  |
| Serine protease inhibitor ecotin                                                           | <i>eco</i>               | Pchs_03604 | 647497248 | 0.54  |
| Glucose/sorbose dehydrogenases                                                             | <i>ylil</i>              | Pchs_03613 | 647497267 | 1.60  |
| phenylacetic acid degradation protein paaN                                                 | <i>paaN</i>              | Pchs_03653 | 647497358 | 1.90  |
| Protein related to penicillin acylase                                                      | <i>pvdQ</i>              | Pchs_03685 | 647497454 | 3.06  |
| maltooligosyl trehalose hydrolase (EC 3.2.1.141)                                           | <i>treZ</i>              | Pchs_03700 | 647497476 | 1.85  |
| glycogen debranching enzyme GlgX                                                           | <i>glgX</i>              | Pchs_03704 | 647497485 | 2.12  |
| Predicted hydrolases or acyltransferases (alpha/beta hydrolase superfamily)                |                          | Pchs_03707 | 647497493 | 2.62  |



|                                                                                                            |               |            |           |      |
|------------------------------------------------------------------------------------------------------------|---------------|------------|-----------|------|
| Transcriptional regulators containing a DNA-binding HTH domain                                             |               | Pchs_03713 | 496339630 | 0.43 |
| transcriptional regulator, LysR family                                                                     |               | Pchs_03732 | 647497545 | 0.53 |
| Parvulin-like peptidyl-prolyl isomerase                                                                    |               | Pchs_03733 | 647497547 | 0.67 |
| Putative bacterial sensory transduction regulator                                                          |               | Pchs_03734 | 647497550 | 0.61 |
| hypothetical protein [Pseudomonas chlororaphis]                                                            |               | Pchs_03746 | 647497576 | 0.34 |
| FecR family protein                                                                                        |               | Pchs_03763 | 647497614 | 0.64 |
| transcriptional regulator, GntR family                                                                     |               | Pchs_03774 | 647497639 | 0.65 |
| Predicted exporters of the RND superfamily                                                                 |               | Pchs_03799 | 647497686 | 1.76 |
| Uncharacterized protein conserved in bacteria                                                              |               | Pchs_03804 | 495196115 | 0.57 |
| diguanylate cyclase (GGDEF) domain                                                                         |               | Pchs_03830 | 647497756 | 1.95 |
| Aerobic-type carbon monoxide dehydrogenase, large subunit CoxL/CutL homologs                               | <i>iorB</i>   | Pchs_03832 | 647497761 | 1.62 |
| phage shock protein A (PspA) family protein                                                                |               | Pchs_03845 | 565884938 | 0.55 |
| Ribonuclease I                                                                                             |               | Pchs_03860 | 647497816 | 0.40 |
| Uncharacterized paraquat-inducible protein B                                                               |               | Pchs_03876 | 647497849 | 0.51 |
| hypothetical protein [Pseudomonas chlororaphis]                                                            |               | Pchs_03904 | 496339451 | 0.67 |
| Predicted hydrolases or acyltransferases (alpha/beta hydrolase superfamily)                                |               | Pchs_03930 | 647497983 | 1.51 |
| Protein of unknown function (DUF3616)                                                                      |               | Pchs_03957 | 647498051 | 1.75 |
| hypothetical protein [Pseudomonas chlororaphis]                                                            |               | Pchs_03971 | 647498082 | 2.17 |
| Common central domain of tyrosinase                                                                        |               | Pchs_04012 | 647498174 | 1.92 |
| Sortase and related acyltransferases                                                                       |               | Pchs_04031 | 647498220 | 2.33 |
| aconitase (EC 4.2.1.3)                                                                                     | <i>acnB</i>   | Pchs_04041 | 647498241 | 0.60 |
| hypothetical protein [Pseudomonas chlororaphis]                                                            |               | Pchs_04125 | 647498419 | 0.43 |
| transposase, IS4 family                                                                                    |               | Pchs_04127 | 647498421 | 0.65 |
| amidase, hydantoinase/carbamoylase family                                                                  |               | Pchs_04140 | 647498458 | 2.07 |
| Pyruvate/2-oxoglutarate dehydrogenase complex, dehydrogenase (E1) component, eukaryotic type, beta subunit | <i>bkdA_2</i> | Pchs_04155 | 647498492 | 2.27 |
| branched-chain alpha-keto acid dehydrogenase E2 component (EC 2.3.1.168)                                   | <i>bkdB</i>   | Pchs_04156 | 647498496 | 2.21 |
| dihydrolipoamide dehydrogenase                                                                             | <i>bkdC</i>   | Pchs_04157 | 647498498 | 2.08 |
| Uncharacterized conserved protein                                                                          |               | Pchs_04162 | 495200274 | 3.56 |
| Protein of unknown function (DUF2599)                                                                      |               | Pchs_04188 | 647498598 | 0.18 |
| Protein of unknown function (DUF2599)                                                                      |               | Pchs_04189 | 647498601 | 0.37 |
| Domain of unknown function (DUF4174)                                                                       |               | Pchs_04209 | 647498751 | 0.60 |
| Dienelactone hydrolase and related enzymes                                                                 |               | Pchs_04245 | 647498852 | 0.64 |
| Phosphatidylserine decarboxylase                                                                           | <i>psd</i>    | Pchs_04246 | 647498854 | 0.62 |
| Predicted metal-dependent hydrolase with the TIM-barrel fold                                               |               | Pchs_04356 | 496340404 | 0.66 |
| type VI secretion system effector, Hcp1 family                                                             | <i>hcp1</i>   | Pchs_04376 | 496335162 | 2.11 |
| type VI secretion protein, VC_A0114 family                                                                 | <i>tssK</i>   | Pchs_04382 | 647500000 | 1.53 |

|                                                                                                                     |               |            |           |      |
|---------------------------------------------------------------------------------------------------------------------|---------------|------------|-----------|------|
| Predicted outer membrane lipoprotein                                                                                | <i>tagQ</i>   | Pchs_04391 | 647500023 | 0.59 |
| hypothetical protein [Pseudomonas chlororaphis]                                                                     |               | Pchs_04404 | 647500060 | 0.48 |
| amino acid adenylation domain                                                                                       | <i>ofaB</i>   | Pchs_04408 | 647500074 | 0.36 |
| Dihydrodipicolinate synthase/N-acetylneuraminatase lyase                                                            |               | Pchs_04427 | 647500141 | 0.68 |
| The Hydrophobe/Amphiphile Efflux-1 (HAE1) Family                                                                    | <i>mexF</i>   | Pchs_04494 | 647500323 | 1.83 |
| Serine/threonine protein kinase                                                                                     | <i>ppkA</i>   | Pchs_04504 | 647500351 | 0.65 |
| hypothetical protein [Pseudomonas chlororaphis]                                                                     |               | Pchs_04510 | 647500371 | 0.16 |
| Uncharacterized protein conserved in bacteria                                                                       |               | Pchs_04526 | 647500433 | 0.13 |
| IscR-regulated protein YhgI                                                                                         | <i>nfuA</i>   | Pchs_04578 | 495197073 | 0.61 |
| DNA-directed DNA polymerase III (polc),dnaE2 error-prone DNA polymerase                                             | <i>dnaE2</i>  | Pchs_04621 | 647485479 | 1.70 |
| cyclic pyranopterin monophosphate synthase subunit MoaC (EC 4.1.99.18)                                              | <i>moaC-2</i> | Pchs_04660 | 647485587 | 1.68 |
| Hypothetical protein (DUF2513)                                                                                      |               | Pchs_04684 | 647485640 | 0.50 |
| hypothetical protein [Pseudomonas chlororaphis]                                                                     |               | Pchs_04744 | 647485792 | 0.65 |
| Inclusion body protein                                                                                              |               | Pchs_04752 | 647485811 | 0.32 |
| Response regulator containing a CheY-like receiver domain and an HD-GYP domain                                      |               | Pchs_04761 | 647485834 | 0.64 |
| PAS domain S-box/diguanylate cyclase (GGDEF) domain                                                                 |               | Pchs_04762 | 647485837 | 0.59 |
| malate:quinone-oxidoreductase                                                                                       | <i>mqaA</i>   | Pchs_04769 | 647485851 | 0.52 |
| periplasmic chaperone LolA                                                                                          | <i>lolA</i>   | Pchs_04785 | 647485891 | 0.57 |
| thioredoxin-disulfide reductase                                                                                     | <i>trxB2</i>  | Pchs_04787 | 647485896 | 1.66 |
| cold-shock DNA-binding protein family                                                                               | <i>cspD</i>   | Pchs_04793 | 496340597 | 0.42 |
| NADH dehydrogenase subunit I (EC 1.6.5.3)                                                                           | <i>nuoI</i>   | Pchs_04812 | 489316425 | 0.65 |
| carbohydrate ABC transporter substrate-binding protein, CUT1 family (TC 3.A.1.1.-)                                  | <i>glpV</i>   | Pchs_04820 | 647485965 | 8.16 |
| Exodeoxyribonuclease III (EC 3.1.11.2)                                                                              | <i>xth</i>    | Pchs_04838 | 647486006 | 0.62 |
| phosphate ABC transporter substrate-binding protein, PhoT family (TC 3.A.1.7.1)                                     |               | Pchs_04840 | 647486011 | 0.63 |
| lysine-arginine-ornithine-binding periplasmic protein arginine/ornithine transport system substrate-binding protein | <i>aotJ</i>   | Pchs_04910 | 647486203 | 3.73 |
| methyl-accepting chemotaxis sensory transducer with Cache sensor                                                    |               | 2527289721 | 647486219 | 0.10 |
| hypothetical protein [Pseudomonas chlororaphis]                                                                     |               | Pchs_04947 | 647486301 | 0.39 |
| TonB-dependent siderophore receptor                                                                                 |               | Pchs_04973 | 647486375 | 1.69 |
| 1,2-dihydroxycyclohexa-3,5-diene-1-carboxylate dehydrogenase (EC 1.3.1.25)                                          | <i>benD</i>   | Pchs_04994 | 647486427 | 5.45 |
| catechol 1,2-dioxygenase, proteobacterial                                                                           | <i>catA</i>   | Pchs_04999 | 647486441 | 2.36 |
| muconate cycloisomerase (EC 5.5.1.1)                                                                                | <i>catB</i>   | Pchs_05001 | 647486448 | 1.97 |

|                                                                                   |               |            |           |       |
|-----------------------------------------------------------------------------------|---------------|------------|-----------|-------|
| Beta-lactamase class C and other penicillin binding proteins                      | <i>ampC</i>   | Pchs_05032 | 647486525 | 2.64  |
| hypothetical protein [Pseudomonas chlororaphis]                                   |               | Pchs_05036 | 647486536 | 0.59  |
| Zn-dependent dipeptidase, microsomal dipeptidase homolog                          | <i>pvdM</i>   | Pchs_05058 | 647486584 | 2.96  |
| Uncharacterized conserved protein pvdO                                            | <i>pvdO</i>   | Pchs_05060 | 647486586 | 2.55  |
| Rhs element Vgr protein                                                           | <i>pvdD</i>   | Pchs_05064 | 647486599 | 1.805 |
| type VI secretion system secreted protein VgrG                                    | <i>vgrG</i>   | Pchs_05080 | 647499197 | 0.69  |
| Deacetylases, including yeast histone deacetylase and acetoin utilization protein | <i>aphA2</i>  | Pchs_05117 | 647493466 | 2.55  |
| Predicted metal-dependent hydrolase with the TIM-barrel fold                      |               | Pchs_05126 | 647493486 | 0.21  |
| amino acid adenylation domain                                                     | <i>pvdJ</i>   | Pchs_05153 | 647493566 | 4.18  |
| Cysteine sulfinate desulfinate/cysteine desulfurase and related enzymes           |               | Pchs_05160 | 647487736 | 0.50  |
| Uncharacterized protein conserved in bacteria                                     |               | Pchs_05171 | 647487763 | 0.60  |
| Methyltransferase domain                                                          |               | Pchs_05180 | 647487786 | 0.66  |
| Thiol:disulfide interchange protein DsbC                                          | <i>dsbG</i>   | Pchs_05187 | 647487804 | 0.67  |
| amino acid ABC transporter substrate-binding protein, PAAT family (TC 3.A.1.3.-)  |               | Pchs_05196 | 647487824 | 0.56  |
| Chemotaxis signal transduction protein                                            |               | Pchs_05207 | 496335741 | 0.31  |
| Enoyl-CoA hydratase/carnithine racemase                                           |               | Pchs_05244 | 647487944 | 1.61  |
| translation elongation factor P (EF-P)                                            | <i>efp</i>    | Pchs_05255 | 495206617 | 0.66  |
| Transcriptional regulator                                                         | <i>cysB</i>   | Pchs_05259 | 495206606 | 0.66  |
| hypothetical protein [Pseudomonas chlororaphis]                                   |               |            | 647488032 | 0.53  |
| Sec-independent protein translocase TatD (EC 3.1.21.-)                            | <i>tatD</i>   | Pchs_05278 | 647488041 | 0.57  |
| Osmosensitive K <sup>+</sup> channel histidine kinase                             | <i>kdpD_1</i> | Pchs_05286 | 647488056 | 0.65  |
| Uncharacterized conserved protein                                                 |               | Pchs_05293 | 647488072 | 3.36  |
| Short-chain dehydrogenases of various substrate specificities                     |               | Pchs_05296 | 647488080 | 0.32  |
| uraH, pucM, hiuH hydroxyisourate hydrolase                                        | <i>uraH_1</i> | Pchs_05375 | 565885224 | 0.36  |
| septum site-determining protein MinD                                              | <i>minD</i>   | Pchs_05388 | 496341044 | 0.69  |
| cell division topological specificity factor MinE                                 | <i>minE</i>   | Pchs_05389 | 495203885 | 0.58  |
| hypothetical protein [Pseudomonas chlororaphis]                                   |               | Pchs_05446 | 647488412 | 0.25  |
| (p)ppGpp synthetase, RelA/SpoT family                                             | <i>relA</i>   | Pchs_05460 | 496341096 | 1.51  |
| Predicted ATPase of the PP-loop superfamily implicated in cell cycle control      | <i>ttcA</i>   | Pchs_05474 | 495207011 | 0.42  |
| flagellar hook-basal body protein                                                 | <i>flgE</i>   | Pchs_05488 | 647488512 | 0.33  |
| Chemotaxis signal transduction protein                                            | <i>cheV</i>   | Pchs_05493 | 647488523 | 0.58  |
| Predicted glycosyltransferase                                                     |               | Pchs_05497 | 647488533 | 0.36  |

|                                                                                                                                  |               |            |           |      |
|----------------------------------------------------------------------------------------------------------------------------------|---------------|------------|-----------|------|
| Transcriptional regulator containing an amidase domain and an AraC-type DNA-binding HTH domain                                   | <i>argA</i>   | Pchs_05530 | 647488676 | 2.73 |
| Ribonucleotide reductase, beta subunit                                                                                           |               | Pchs_05538 | 647488694 | 0.62 |
| transcriptional regulator, TetR family                                                                                           |               | Pchs_05547 | 647488718 | 0.66 |
| Uncharacterized protein conserved in bacteria                                                                                    |               | Pchs_05586 | 647488820 | 0.57 |
| Aspartate/tyrosine/aromatic aminotransferase                                                                                     |               | Pchs_05588 | 495200347 | 2.09 |
| Acyl dehydratase                                                                                                                 |               | Pchs_05619 | 495200297 | 0.64 |
| porin, OprB family (TC 1.B.19)                                                                                                   | <i>oprB</i>   | Pchs_05630 | 647488916 | 1.56 |
| TonB-dependent heme/hemoglobin receptor family protein/TonB-dependent hemoglobin/transferrin/lactoferrin receptor family protein | <i>phuR</i>   | Pchs_05644 | 647488959 | 1.56 |
| Heme oxygenase                                                                                                                   | <i>hemO</i>   | Pchs_05645 | 647488963 | 0.45 |
| hypothetical protein                                                                                                             |               | Pchs_05655 | 647488987 | 0.64 |
| Flp pilus assembly protein, ATPase CpaF                                                                                          | <i>cpaF</i>   | Pchs_05669 | 647489032 | 1.78 |
| Flp pilus assembly protein, ATPase CpaE                                                                                          | <i>cpaE</i>   | Pchs_05670 | 647489034 | 1.53 |
| Flp pilus assembly protein CpaB                                                                                                  | <i>cpaB</i>   | Pchs_05674 | 647489046 | 1.71 |
| outer membrane porin, OprD family                                                                                                | <i>oprD</i>   | Pchs_05700 | 647489116 | 1.67 |
| methyl-accepting chemotaxis sensory transducer with Cache sensor                                                                 | <i>pctA_1</i> | Pchs_05712 | 647489142 | 0.13 |
| fumarase, class I, homodimeric (EC 4.2.1.2)                                                                                      |               | Pchs_05731 | 495206415 | 0.67 |
| Superoxide dismutase                                                                                                             | <i>sodB</i>   | Pchs_05758 | 495204984 | 0.57 |
| Protein affecting phage T7 exclusion by the F plasmid, fxsA UPF0716 protein FxsA                                                 |               | Pchs_05775 | 495207922 | 0.67 |
| bacterioferritin                                                                                                                 | <i>bfr_1</i>  | Pchs_05793 | 496341376 | 0.59 |
| monothiol glutaredoxin, Grx4 family                                                                                              | <i>grxD</i>   | Pchs_05794 | 495197636 | 0.49 |
| Cys-tRNA(Pro) deacylase                                                                                                          | <i>ybaK</i>   | Pchs_05799 | 515073603 | 0.67 |
| L-glutamate-binding protein/L-aspartate-binding protein                                                                          | <i>glI</i>    | Pchs_05804 | 647489345 | 0.61 |
| methionine synthase (B12-independent) (EC 2.1.1.14)                                                                              | <i>metE</i>   | Pchs_05826 | 647489417 | 0.34 |
| transcriptional regulator, LysR family                                                                                           | <i>metR</i>   | Pchs_05827 | 496341406 | 0.60 |
| hypothetical protein                                                                                                             |               | Pchs_05841 | 647489456 | 0.24 |
| diguanylate cyclase/phosphodiesterase                                                                                            |               | Pchs_05855 | 647489490 | 3.01 |
| ATP dependent PIM1 peptidase. Serine peptidase. MEROPS family S16, ATP-dependent Lon protease                                    | <i>lon_2</i>  | Pchs_05857 | 647489494 | 0.66 |
| Maltoporin (phage lambda and maltose receptor)                                                                                   | <i>lamB</i>   | Pchs_05866 | 647489516 | 0.68 |
| inosine-5'-monophosphate dehydrogenase (EC 1.1.1.205)                                                                            | <i>guaB</i>   | Pchs_05873 | 647489531 | 0.63 |
| Uncharacterized protein conserved in bacteria                                                                                    |               | Pchs_05888 | 647489562 | 0.67 |
| Chaperone protein HscA                                                                                                           | <i>hscA</i>   | Pchs_05894 | 647489571 | 0.63 |

|                                                                                             |               |            |           |      |
|---------------------------------------------------------------------------------------------|---------------|------------|-----------|------|
| hypothetical protein [Pseudomonas chlororaphis]                                             |               |            | 647489597 | 1.80 |
| Iron-binding apoprotein IscA                                                                | <i>iscA</i>   | Pchs_05896 | 495204743 | 0.58 |
| FeS assembly scaffold apoprotein IscU                                                       | <i>iscU</i>   | Pchs_05897 | 495204742 | 0.62 |
| cysteine desulfurase IscS                                                                   | <i>iscS</i>   | Pchs_05898 | 647489588 | 0.62 |
| Archaeal fructose-1,6-bisphosphatase and related enzymes of inositol monophosphatase family | <i>suhB</i>   | Pchs_05902 | 495204733 | 0.65 |
| Uncharacterized conserved protein                                                           |               | Pchs_05927 | 647489639 | 0.41 |
| outer membrane porin, OprD family                                                           |               | Pchs_05976 | 647489767 | 0.67 |
| ubiquinol-cytochrome c reductase, iron-sulfur subunit                                       | <i>petA</i>   | Pchs_06004 | 495203673 | 0.67 |
| Predicted oxidoreductases (related to aryl-alcohol dehydrogenases)                          | <i>tas</i>    | Pchs_06007 | 647489831 | 0.49 |
| Uncharacterized protein conserved in bacteria                                               |               | Pchs_06013 | 495203647 | 0.48 |
| hypothetical protein[Pseudomonas chlororaphis]                                              |               | Pchs_06041 | 647489909 | 0.63 |
| Phenazine biosynthesis protein A/B                                                          | <i>phzA</i>   | Pchs_06091 | 647490047 | 5.60 |
| Phenazine biosynthesis protein A/B                                                          | <i>phzB</i>   | Pchs_06092 | 647490048 | 4.48 |
| Isochorismate hydrolase                                                                     | <i>phzD</i>   | Pchs_06094 | 647490052 | 5.52 |
| Anthranilate/para-aminobenzoate synthases component I                                       | <i>phzE</i>   | Pchs_06095 | 647490054 | 0.56 |
| phenazine biosynthesis protein PhzF family                                                  | <i>phzF</i>   | Pchs_06096 | 647490057 | 1.78 |
| Pyridoxamine 5'-phosphate oxidase (EC 1.4.3.5)                                              | <i>phzG</i>   | Pchs_06097 | 647490058 | 2.58 |
| phzH asparagine synthase (glutamine-hydrolyzing)                                            | <i>phzH</i>   | Pchs_06098 | 647490062 | 3.33 |
| methyl-accepting chemotaxis sensory transducer with Pas/Pac sensor                          |               | Pchs_06122 | 647490123 | 0.47 |
| Carbonic anhydrase                                                                          | <i>cah_3</i>  | Pchs_06146 | 496341688 | 0.56 |
| Paraquat-inducible protein B                                                                |               | Pchs_06153 | 647485192 | 2.39 |
| Uncharacterized low-complexity proteins                                                     |               | Pchs_06168 | 647487583 | 0.21 |
| acetyl-coenzyme A synthetase (EC 6.2.1.1)                                                   | <i>acsA_2</i> | Pchs_06191 | 647487629 | 2.32 |
| hypothetical protein [Pseudomonas chlororaphis]                                             |               | Pchs_06205 | 647493612 | 0.40 |
| mannose-1-phosphate guanylyltransferase /mannose-6-phosphate isomerase                      | <i>pslB</i>   | Pchs_06207 | 647493618 | 2.76 |
| Periplasmic protein involved in polysaccharide export                                       | <i>pslD</i>   | Pchs_06209 | 647493628 | 3.72 |
| Uncharacterized protein involved in exopolysaccharide biosynthesis                          | <i>pslE</i>   | Pchs_06210 | 647493630 | 2.43 |
| Glycosyltransferase                                                                         | <i>pslF</i>   | Pchs_06211 | 647493633 | 1.85 |
| Beta-xylosidase                                                                             | <i>pslG</i>   | Pchs_06212 | 647493636 | 2.03 |
| Glycosyltransferase                                                                         | <i>pslH</i>   | Pchs_06213 | 647493640 | 2.15 |
| Glycosyltransferase                                                                         | <i>pslI</i>   | Pchs_06214 | 647493643 | 2.55 |
| Acetyltransferase (isoleucine patch superfamily)                                            |               | Pchs_06216 | 647493651 | 2.6  |
| serine hydroxymethyltransferase (EC 2.1.2.1)                                                | <i>glyA_</i>  | Pchs_06270 | 496341782 | 0.53 |

|                                                               |             |            |           |      |
|---------------------------------------------------------------|-------------|------------|-----------|------|
|                                                               | <i>I</i>    |            |           |      |
| Putative GTPases (G3E family)                                 | <i>yjiA</i> | Pchs_06274 | 647493771 | 1.57 |
| Catalase                                                      | <i>katB</i> | Pchs_06282 | 647493790 | 0.57 |
| ATP-dependent helicase HrpB                                   | <i>hrpB</i> | Pchs_06334 | 647493935 | 0.61 |
| 3-methyladenine DNA glycosylase                               |             | Pchs_06375 | 647494074 | 0.64 |
| SnoaL-like domain                                             |             | Pchs_06396 | 647494150 | 0.63 |
| Catalase                                                      | <i>katA</i> | Pchs_06450 | 647494300 | 0.45 |
| translation elongation factor 1A (EF-1A/EF-Tu)                | <i>tuf</i>  | Pchs_06497 | 647485244 | 0.62 |
| Phospholipase/lecithinase/hemolysin                           |             | Pchs_06505 | 647483767 | 2.90 |
| Short-chain dehydrogenases of various substrate specificities |             | Pchs_06514 | 647483795 | 0.62 |
| N-acetyl-gamma-glutamyl-phosphate reductase (EC 1.2.1.38)     | <i>argC</i> | Pchs_06518 | 647483803 | 0.61 |
| hypothetical protein [Pseudomonas chlororaphis]               |             |            | 489267827 | 0.54 |

**Supplementary Table S3. Primers used in this study**

| Primer names                     | Primer sequences (5'-3')                    | Applications      |
|----------------------------------|---------------------------------------------|-------------------|
| <b>Primers for RT-qPCR</b>       |                                             |                   |
| RpoD-F                           | TGGCAATGAAGTGGACGAAA                        | <i>rpoD</i> gene  |
| RpoD-R                           | TTCTGCTGGCAACGGATGAT                        |                   |
| PhzA-F                           | GTACATGCGCACTAACGGCA                        | <i>phzA</i> gene  |
| PhzA-R                           | AGCATTCTCCAGCCATTCCG                        |                   |
| PhzE-F                           | CCGACGAGCTGTACATGGTG                        | <i>phzE</i> gene  |
| PhzE-R                           | GCGCCATTTCCTTGAGGTAA                        |                   |
| PhzD-F                           | CGACCTGCCCATCAACCTC                         | <i>phzD</i> gene  |
| PhzD-R                           | CCACTTGTTACGCAGGG                           |                   |
| PstS-F                           | CTTCGGTGGTCCAGTCCATC                        | <i>pstS</i> gene  |
| PstS-R                           | GATGAAGTCGCTGCTGCCTT                        |                   |
| Pchs_00644-F                     | GTGGTGAAGAACCAGCAGGC                        | Pchs_00644 gene   |
| Pchs_00644-R                     | GTGAACTGCTCATAGCGCC                         |                   |
| PvdJ-F                           | GGCCTGAGCGACAACCTTCTT                       | <i>pvdJ</i> gene  |
| PvdJ-R                           | GCAGACGCACGAAGTCTTCC                        |                   |
| NrtA-F                           | TGGTTCATGACCCAGTTCCG                        | <i>nrtA</i> gene  |
| NrtA-R                           | GGCGGCTTCACGATAGAGCT                        |                   |
| NtrC-F                           | CTGTTCAACATGTGGTCGCC                        | <i>ntrC</i> gene  |
| NtrC-R                           | TACATCTCCAGCCGAGTC                          |                   |
| GlnA-F                           | TCGAAGCCTCCGACATGATC                        | <i>glnA</i> gene  |
| GlnA-R                           | AAGGCTCGATGATGTCGCAC                        |                   |
| ImpC-F                           | CCTCAACGTCTCCAAGCAGG                        | <i>impC</i> gene  |
| ImpC-R                           | GGCCGTATTCAGCGGTGTAG                        |                   |
| Hcp-F                            | AATCCTCCCCAACCTGATG                         | <i>hcp</i> gene   |
| Hcp-R                            | TCAGGTACTCCACCGGATCG                        |                   |
| <b>Primers for gene deletion</b> |                                             |                   |
| HS1F1                            | AAGAATTCATGATGGTGCCGTCCTTCTTC               | T6SS-HS1 deletion |
| HS1R1                            | GTTGTTTCATCCACGCCGAGAA                      |                   |
| HS1F2                            | TCGGCGTGGATGAACAACACGCCTCCATCAGCCAGTT       |                   |
| HS1R2                            | GCTCTAGACTATGGTCAGCGGGAAGTAGC               |                   |
| HS2F1                            | AAGAATTCAACTACCGTCTCAAGTGCCATC              | T6SS-HS2 deletion |
| HS2R1                            | GCCTCGTATTCGCTGGAGAAG                       |                   |
| HS2F2                            | CTCCAGCGAATACGAGGCGCCGAAGAACACCGCATC<br>A   |                   |
| HS2R2                            | GCTCTAGATCACCGTTTCCACCGAGTAGT               |                   |
| HS3F1                            | AAGAATTCCTACTGCTTGCCGTGGTGCT                | T6SS-HS3 deletion |
| HS3R1                            | TCGCCAAGGACGTGCTCAA                         |                   |
| HS3F2                            | TGAGCACGTCTTGGCGACTACAGCAGTTCCGTGACA<br>AGT |                   |
| HS3R2                            | GCTCTAGACCTACCGTCCTCCGTCCTTT                |                   |

## Supplementary Figures and Legends

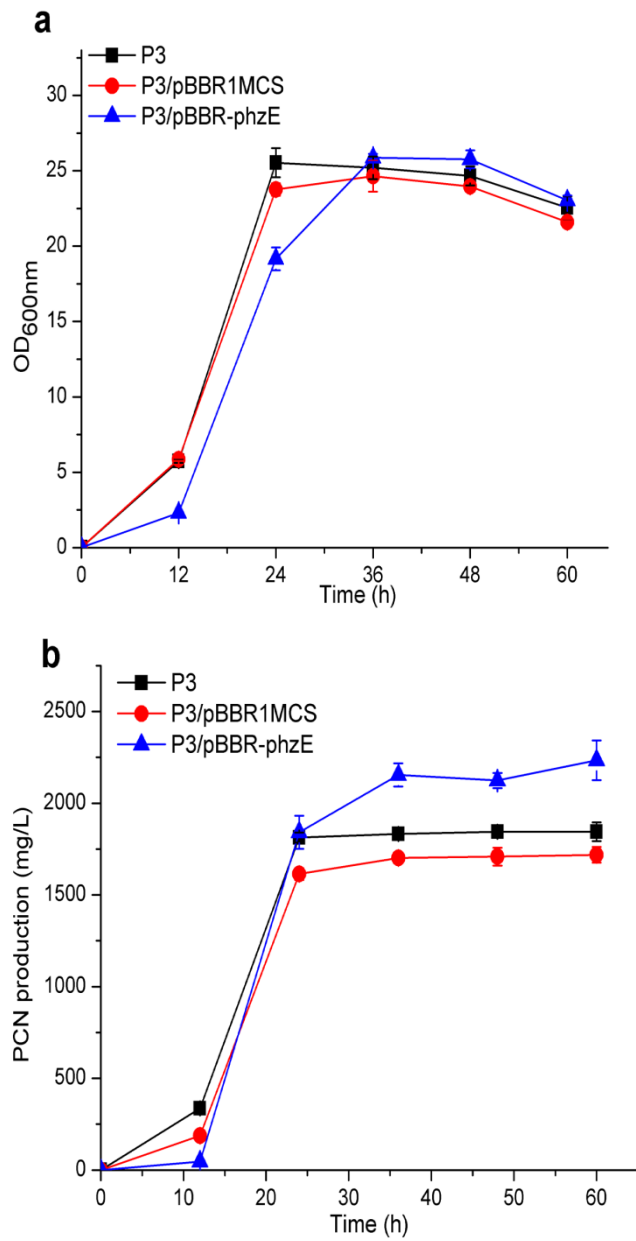

**Supplementary Figure S1. Overexpression of *phzE* gene in mutant P3. The growth (a) and phenazine-1-carboxamide production (b).**



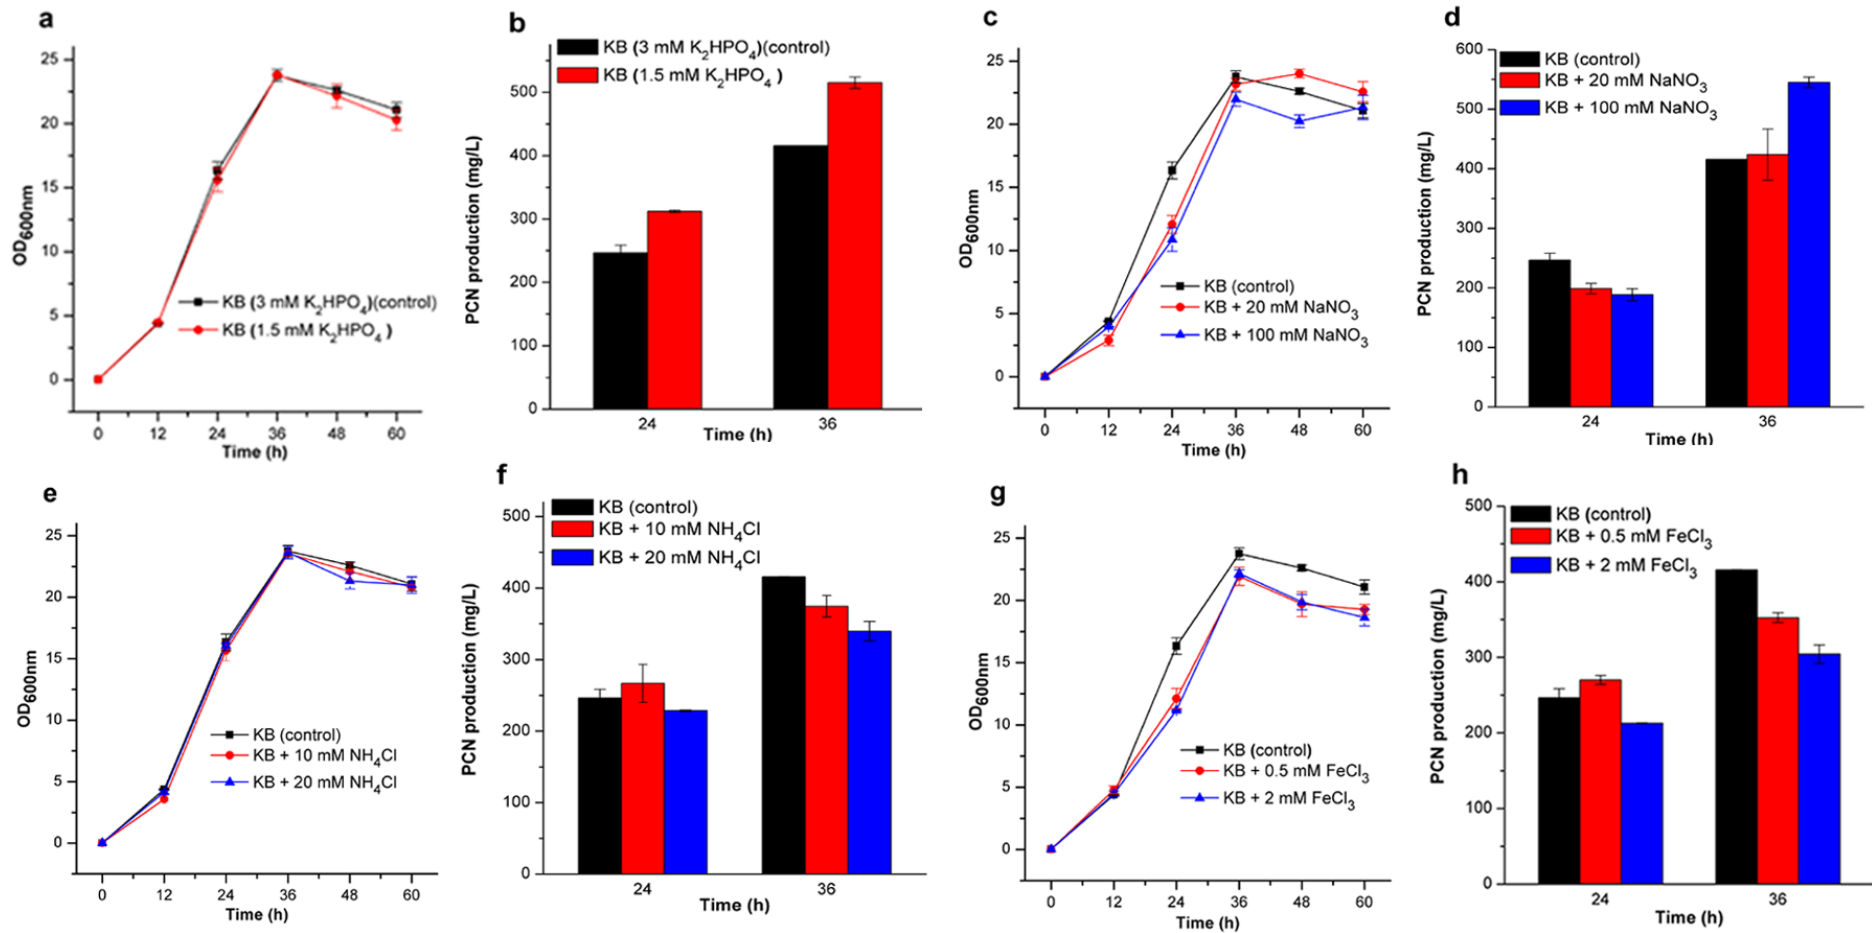

**Supplementary Figure S2. Influence of inorganic ions on the growth and phenazine-1-carboxamide (PCN) production.** The growth and

PCN production of wild-type strain HT66 in KB medium amended with different concentrations of  $K_2HPO_4$  (a) and (b),  $NaNO_3$  (c) and (d),  $NH_4Cl$  (e) and (f);  $FeCl_3$  (g) and (h), respectively. Experiments were performed at least three times with similar results. Data of one of the experiments are shown.
